# Supplementary material
Source: publisher figshare collection journal article supplement (https://acs.figshare.com/ndownloader/files/3869344)
Supplement: Supplementary file 1 [file 3869344]

Supporting Information (file 1 of 2)

# Wettability of Electrospun Films of Microphase-Separated Block Copolymers with 3,3,3-Trifluoropropyl Substituted Siloxane Segments

*Lingmin Yi,<sup>1,2,3,\*</sup> Xiaomei Meng,<sup>1,2</sup> Xiaoping Tian,<sup>1,2</sup> Wei Zhou,<sup>1,2</sup> and Ruiwen Chen<sup>1,2</sup>*

<sup>1</sup> Key Laboratory of Advanced Textile Materials and Manufacturing Technology, Ministry of Education, Zhejiang Sci-Tech University, Hangzhou 310018, P. R. China

<sup>2</sup> Engineering Research Center for Eco-Dyeing & Finishing of Textiles, Ministry of Education, Zhejiang Sci-Tech University, Hangzhou 310018, P. R. China

<sup>3</sup> Department of Chemical Engineering & Materials Science, Stevens Institute of Technology, Hoboken, NJ 07030, USA

\*To whom correspondence should be addressed. Tel.: +86 571 86843383. Fax: +86 571 86843255. E-mail: lmyi@zstu.edu.cn.

Full Reference 36:

(36) Yeung, L. W. Y.; So, M. K.; Jiang, G.; Taniyasu, S.; Yamashita, N.; Song, M.; Wu, Y.; Li, J.; Giesy, J. P.; Guruge, K. S.; Lam, P. K. S. Perfluorooctanesulfonate and Related Fluorochemicals in Human Blood Samples from China. *Environ. Sci. Technol.* **2006**, *40*, 715–720.

Full Reference 61:

(61) Ruotsalainen, T.; Turku, J.; Heikkilä, P.; Ruokolainen, J.; Nykänen, A.; Laitinen, T.; Torkkeli, M.; Serimaa, R.; ten Brinke, G.; Harlin, A.; Ikkala, O. Towards Internal Structuring of Electrospun Fibers by Hierarchical Self-Assembly of Polymeric Comb-Shaped Supramolecules. *Adv. Mater.* **2005**, *17*, 1048–1052.

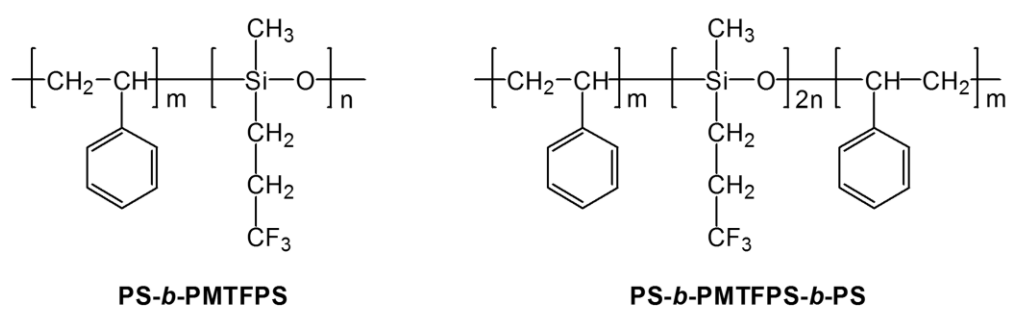

**Figure S1.** Chemical structures of PS-*b*-PMTFPS diblock copolymers and PS-*b*-PMTFPS-*b*-PS triblock copolymers.

**Table S1.** Glass transition temperature of PS precursors, PS-*b*-PMTFPS diblock copolymers and PS-*b*-PMTFPS-*b*-PS triblock copolymers.<sup>a</sup>

| Sample                                            | $T_{g, \text{ homo-PS }} (^\circ\text{C})^b$ | $T_{g, \text{ PS }} (^\circ\text{C})^c$ | $T_{g, \text{ PMTFPS }} (^\circ\text{C})^d$ |
|---------------------------------------------------|----------------------------------------------|-----------------------------------------|---------------------------------------------|
| S <sub>198</sub> FS <sub>26</sub>                 | 104                                          | 98                                      | — <sup>e</sup>                              |
| S <sub>106</sub> FS <sub>54</sub>                 | 99                                           | 97                                      | −66                                         |
| S <sub>105</sub> FS <sub>97</sub>                 | 99                                           | 97                                      | −68                                         |
| S <sub>100</sub> FS <sub>191</sub>                | 99                                           | 98                                      | −69                                         |
| S <sub>99</sub> FS <sub>111</sub> S <sub>99</sub> | 98                                           | 96                                      | −67                                         |
| S <sub>95</sub> FS <sub>175</sub> S <sub>95</sub> | 98                                           | 96                                      | −68                                         |

<sup>a</sup> The glass transition temperature ( $T_g$ ) was measured with a Q100 differential scanning calorimetry (DSC) (TA Instruments Inc.) calibrated with indium. After annealed at 150 ~ 160 °C, the samples were quenched down to −120°C at the maximum cooling rate of the instrument, and then scanned at a heating rate of 10°C /min from −120°C up to 150 °C.

<sup>b</sup> Glass transition temperature of PS precursors.

<sup>c</sup> Glass transition temperature of PS block in block copolymers.

<sup>d</sup> Glass transition temperature of PMTFPS block in block copolymers.

<sup>e</sup> The glass transition temperature of PMTFPS block was difficult to be clearly discerned due to a short length of PMTFPS block.

**Table S2.** Contact angles and roll-off angles of salad oil on the electrospun films.

| Sample <sup>a</sup>                               | salad oil <sup>b</sup> |               |              |              |
|---------------------------------------------------|------------------------|---------------|--------------|--------------|
|                                                   | static (°)             | advancing (°) | receding (°) | roll-off (°) |
| S <sub>198</sub> FS <sub>26</sub>                 | 131.7±1.4              | 135.9±0.4     | 127.0±1.9    | 8.9          |
| S <sub>106</sub> FS <sub>54</sub>                 | 137.2±5.2              | 140.2±1.5     | 132.2±1.3    | 8.0          |
| S <sub>105</sub> FS <sub>97</sub>                 | 143.6±1.6              | 145.7±1.2     | 140.0±1.8    | 5.7          |
| S <sub>100</sub> FS <sub>191</sub>                | 143.4±1.6              | 145.1±1.4     | 139.0±1.4    | 6.1          |
| S <sub>99</sub> FS <sub>111</sub> S <sub>99</sub> | 138.7±2.1              | 141.0±1.2     | 135.0±1.0    | 6.0          |
| S <sub>95</sub> FS <sub>175</sub> S <sub>95</sub> | 139.1±3.7              | 143.4±1.1     | 137.6±1.2    | 5.8          |

<sup>a</sup> The concentration of electrospinning solutions: (1) 15wt% in DMF: S<sub>100</sub>FS<sub>191</sub>; (2) 25wt% in DMF: S<sub>198</sub>FS<sub>26</sub>, S<sub>105</sub>FS<sub>97</sub>; (3) 25wt% in DMF and THF (1/1, v/v): S<sub>99</sub>FS<sub>111</sub>S<sub>99</sub>, S<sub>95</sub>FS<sub>175</sub>S<sub>95</sub>; (4) 30wt% in DMF and THF (1/1, v/v): S<sub>106</sub>FS<sub>54</sub>. Electrospinning conditions: tip-to-plate distance = 15 cm; humidity = 38%; flow rate = 0.6 mL/h; spinning voltage = 15 kV.

<sup>b</sup> Colored by Oil Red O (1-(2,5-Dimethyl-4-(2,5-dimethylphenylazo)phenylazo)-2-naphthol) with a concentration of 0.4mg/mL.

**Table S3.** Contact angles and roll-off angles of white mineral oil on the electrospun films.

| Sample <sup>a</sup>                               | white mineral oil <sup>b</sup> |               |              |              |
|---------------------------------------------------|--------------------------------|---------------|--------------|--------------|
|                                                   | static (°)                     | advancing (°) | receding (°) | roll-off (°) |
| S <sub>198</sub> FS <sub>26</sub>                 | 126.6±2.5                      | 131.4±1.1     | 120.6±0.9    | 10.8         |
| S <sub>106</sub> FS <sub>54</sub>                 | 130.1±3.5                      | 134.7±1.9     | 125.4±1.8    | 9.3          |
| S <sub>105</sub> FS <sub>97</sub>                 | 140.7±2.9                      | 143.7±1.2     | 137.0±1.1    | 6.7          |
| S <sub>100</sub> FS <sub>191</sub>                | 141.7±1.4                      | 143.6±0.9     | 137.1±1.7    | 6.5          |
| S <sub>99</sub> FS <sub>111</sub> S <sub>99</sub> | 138.1±1.2                      | 139.4±1.2     | 133.2±0.6    | 6.2          |
| S <sub>95</sub> FS <sub>175</sub> S <sub>95</sub> | 138.2±5.2                      | 139.5±0.4     | 133.1±1.1    | 6.4          |

<sup>a</sup> The concentration of electrospinning solutions: (1) 15wt% in DMF: S<sub>100</sub>FS<sub>191</sub>; (2) 25wt% in DMF: S<sub>198</sub>FS<sub>26</sub>, S<sub>105</sub>FS<sub>97</sub>; (3) 25wt% in DMF and THF (1/1, v/v): S<sub>99</sub>FS<sub>111</sub>S<sub>99</sub>, S<sub>95</sub>FS<sub>175</sub>S<sub>95</sub>; (4) 30wt% in DMF and THF (1/1, v/v): S<sub>106</sub>FS<sub>54</sub>. Electrospinning conditions: tip-to-plate distance = 15 cm; humidity = 38%; flow rate = 0.6 mL/h; spinning voltage = 15 kV.

<sup>b</sup> Colored by Oil Red O (1-(2,5-Dimethyl-4-(2,5-dimethylphenylazo)phenylazo)-2-naphthol) with a concentration of 0.4mg/mL.

**Table S4.** Contact angles and roll-off angles of hexadecane on the electrospun films.

| Sample <sup>a</sup>                               | hexadecane <sup>b</sup> |               |              |              |
|---------------------------------------------------|-------------------------|---------------|--------------|--------------|
|                                                   | static (°)              | advancing (°) | receding (°) | roll-off (°) |
| S <sub>198</sub> FS <sub>26</sub>                 | 116.6±1.7               | 119.8±0.9     | 105.9±1.4    | 13.9         |
| S <sub>106</sub> FS <sub>54</sub>                 | 122.6±3.2               | 124.5±1.0     | 113.3±1.7    | 11.2         |
| S <sub>105</sub> FS <sub>97</sub>                 | 134.2±4.1               | 135.3±1.4     | 126.2±0.7    | 9.1          |
| S <sub>100</sub> FS <sub>191</sub>                | 136.5±3.3               | 137.6±1.3     | 129.3±1.1    | 8.3          |
| S <sub>99</sub> FS <sub>111</sub> S <sub>99</sub> | 134.5±0.7               | 138.3±0.7     | 129.4±1.2    | 8.9          |
| S <sub>95</sub> FS <sub>175</sub> S <sub>95</sub> | 135.0±2.4               | 137.8±1.2     | 130.3±1.3    | 7.5          |

<sup>a</sup> The concentration of electrospinning solutions: (1) 15wt% in DMF: S<sub>100</sub>FS<sub>191</sub>; (2) 25wt% in DMF: S<sub>198</sub>FS<sub>26</sub>, S<sub>105</sub>FS<sub>97</sub>; (3) 25wt% in DMF and THF (1/1, v/v): S<sub>99</sub>FS<sub>111</sub>S<sub>99</sub>, S<sub>95</sub>FS<sub>175</sub>S<sub>95</sub>; (4) 30wt% in DMF and THF (1/1, v/v): S<sub>106</sub>FS<sub>54</sub>. Electrospinning conditions: tip-to-plate distance = 15 cm; humidity = 38%; flow rate = 0.6 mL/h; spinning voltage = 15 kV.

<sup>b</sup> Colored by Oil Red O (1-(2,5-Dimethyl-4-(2,5-dimethylphenylazo)phenylazo)-2-naphthol) with a concentration of 0.4mg/mL.

**Table S5.** Surface composition of the thin films of block copolymers determined by ARXPS at 30° and 60 °takeoff angle.

| Sample <sup>a</sup>                               | Si 2p (%) |      | C 1s (%) |      | O 1s (%) |      | F 1s (%) |      | X (%) <sup>b</sup> |       |
|---------------------------------------------------|-----------|------|----------|------|----------|------|----------|------|--------------------|-------|
|                                                   | 60 °      | 30 ° | 60 °     | 30 ° | 60 °     | 30 ° | 60 °     | 30 ° | 60 °               | 30 °  |
| S <sub>198</sub> FS <sub>26</sub>                 | 7.6       | 9.9  | 77.1     | 71.5 | 8.8      | 11.4 | 6.5      | 7.2  | 56.5               | 71.3  |
| S <sub>106</sub> FS <sub>54</sub>                 | 10.1      | 12.9 | 61.5     | 56.2 | 10.1     | 12.4 | 18.3     | 18.6 | 79.2               | 95.5  |
| S <sub>105</sub> FS <sub>97</sub>                 | 12.8      | 14.1 | 49.5     | 45.9 | 13.2     | 13.2 | 24.5     | 26.9 | 101.5              | 110.3 |
| S <sub>100</sub> FS <sub>191</sub>                | 11.1      | 12.7 | 53.2     | 49.9 | 11.6     | 11.9 | 24.1     | 25.5 | 90.9               | 100.8 |
| S <sub>99</sub> FS <sub>111</sub> S <sub>99</sub> | 9.7       | 10.2 | 57.4     | 53.1 | 10.5     | 12.1 | 22.3     | 24.6 | 80.9               | 86.7  |
| S <sub>95</sub> FS <sub>175</sub> S <sub>95</sub> | 12.3      | 12.7 | 50.3     | 46.9 | 11.9     | 14.0 | 25.5     | 26.4 | 98.9               | 104.1 |

<sup>a</sup> The thin films were prepared by spin coating on the aluminum foil (0.1 mm thick, 99.9% metals basis) from a concentration of 1.0 wt% in THF. The solvent was allowed to evaporate in air at room temperature, and then the films were further annealed at 120 °C under vacuum over 24 hours.

<sup>b</sup> X is the PMTFPS molar fraction at the surface, which is estimated by the carbon to silicon atomic ratios (C/Si) and given by the equation  $C/Si = [4X + 8 (1-X)]/X$ . It needs to be noted that some values of X are greater than 100%, which is likely caused by the interactions of fluorines with adjacent silicon atoms (Reference: Owen, M. J. Surface Tension of Polytrifluoropropylmethylsiloxane. *J. Appl. Polym. Sci.* **1988**, 35, 895–901), and then more silicon atoms arrange at the outmost layer of block copolymer films.
